# Supplementary material for: Sequence and Expression Analyses of Ethylene Response Factors Highly Expressed in Latex Cells from Hevea brasiliensis
Source: PubMed Central journal article supplement (PMC4074046; doi:10.1371/journal.pone.0099367), 2014-06-27
Supplement: pone.0099367.s001.pdf [file pone.0099367.s001.pdf]

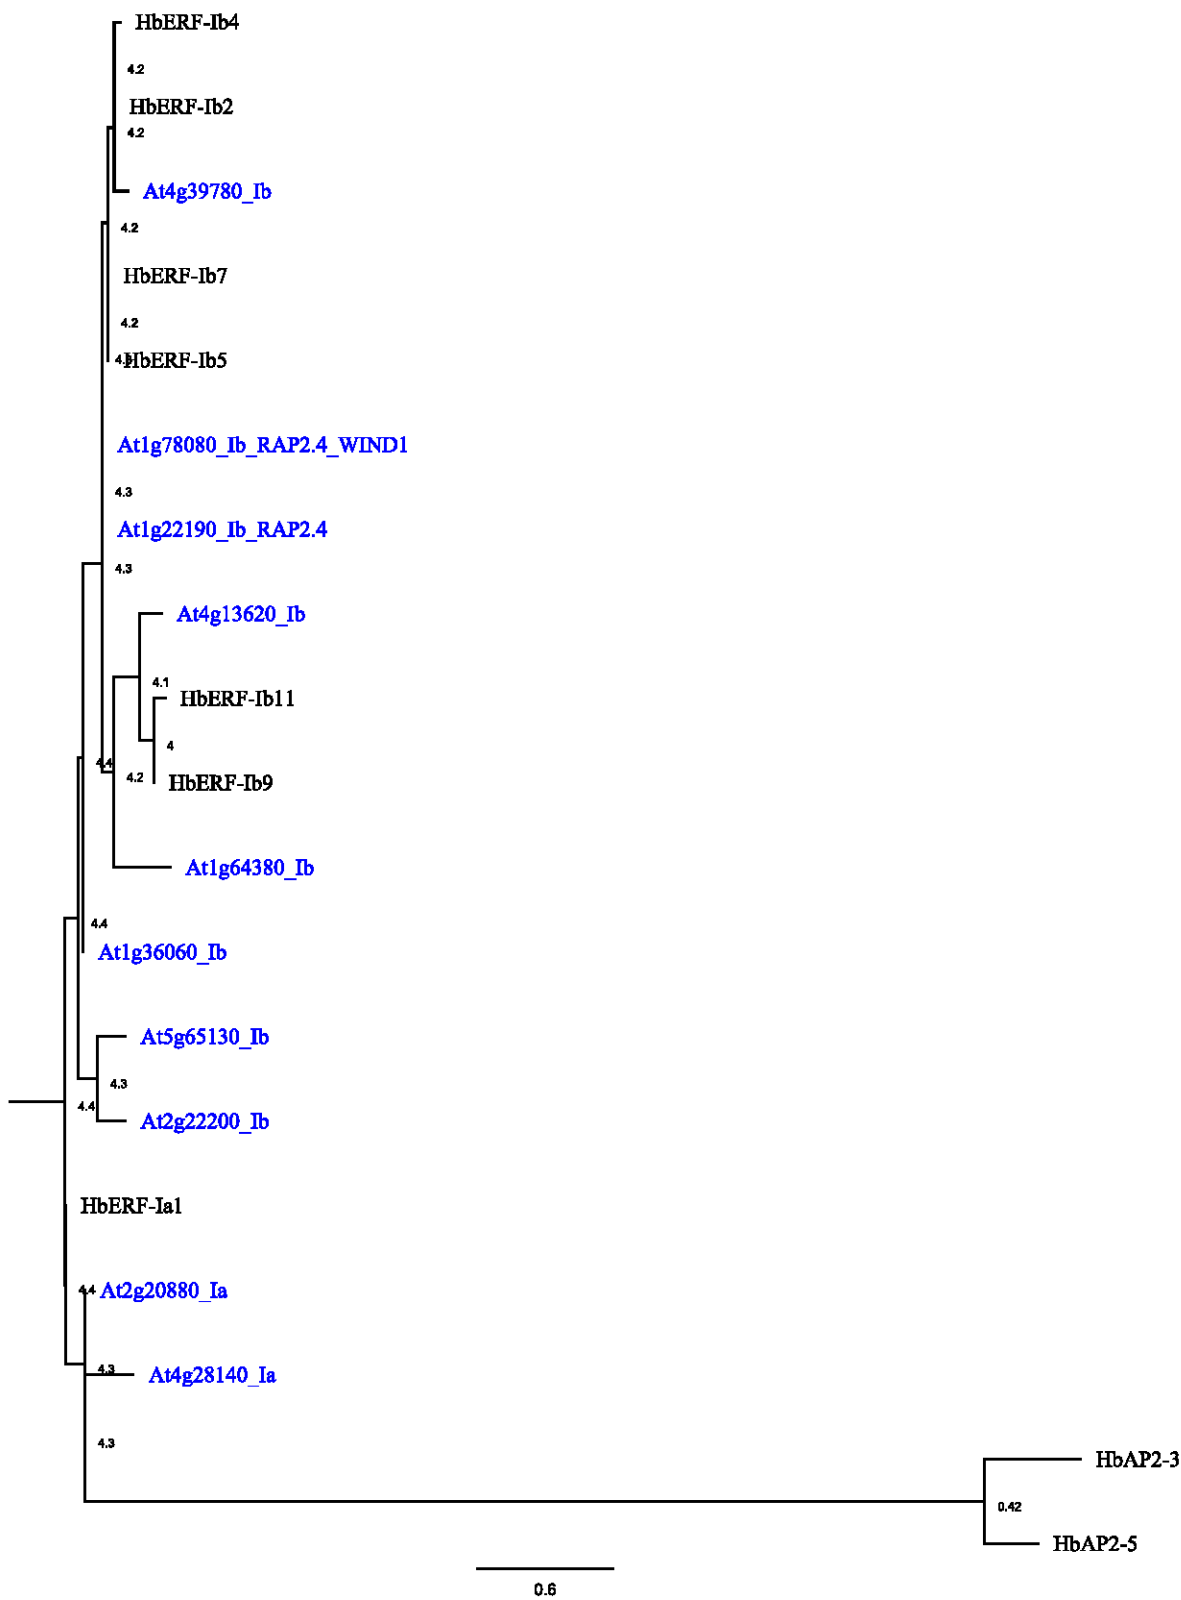

**Figure 1**

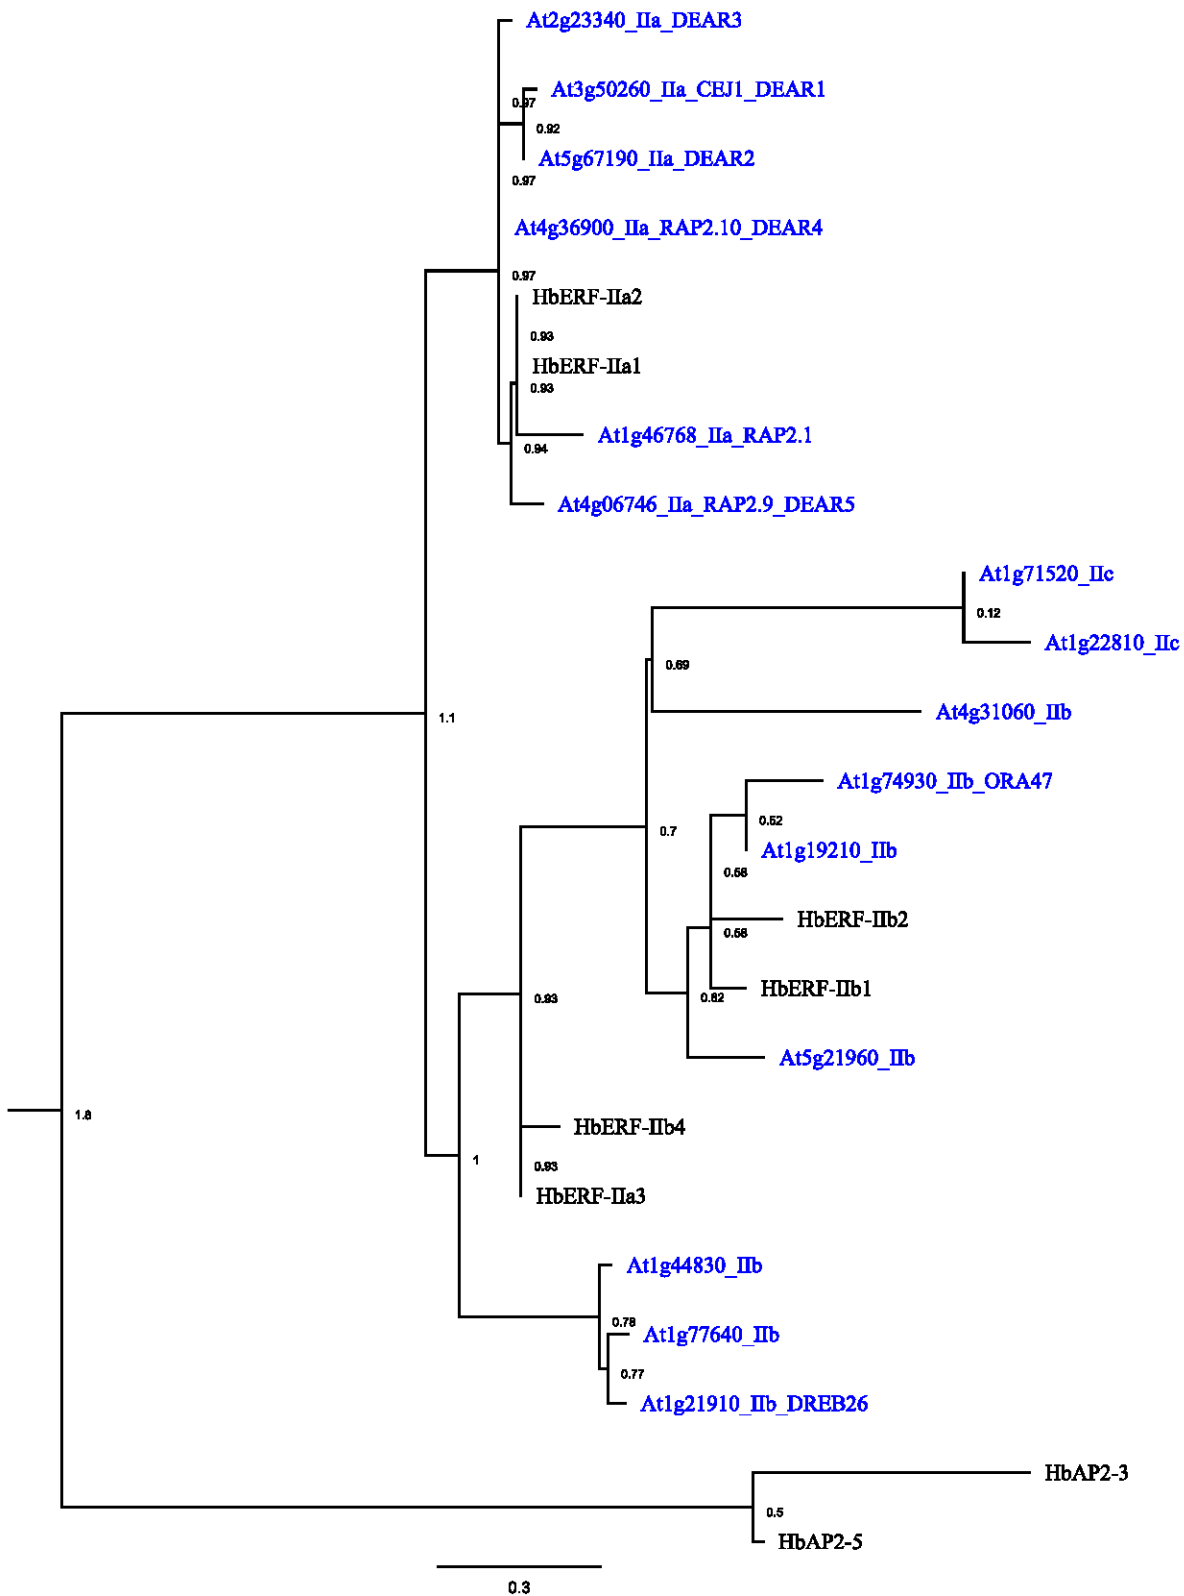

Figure 2

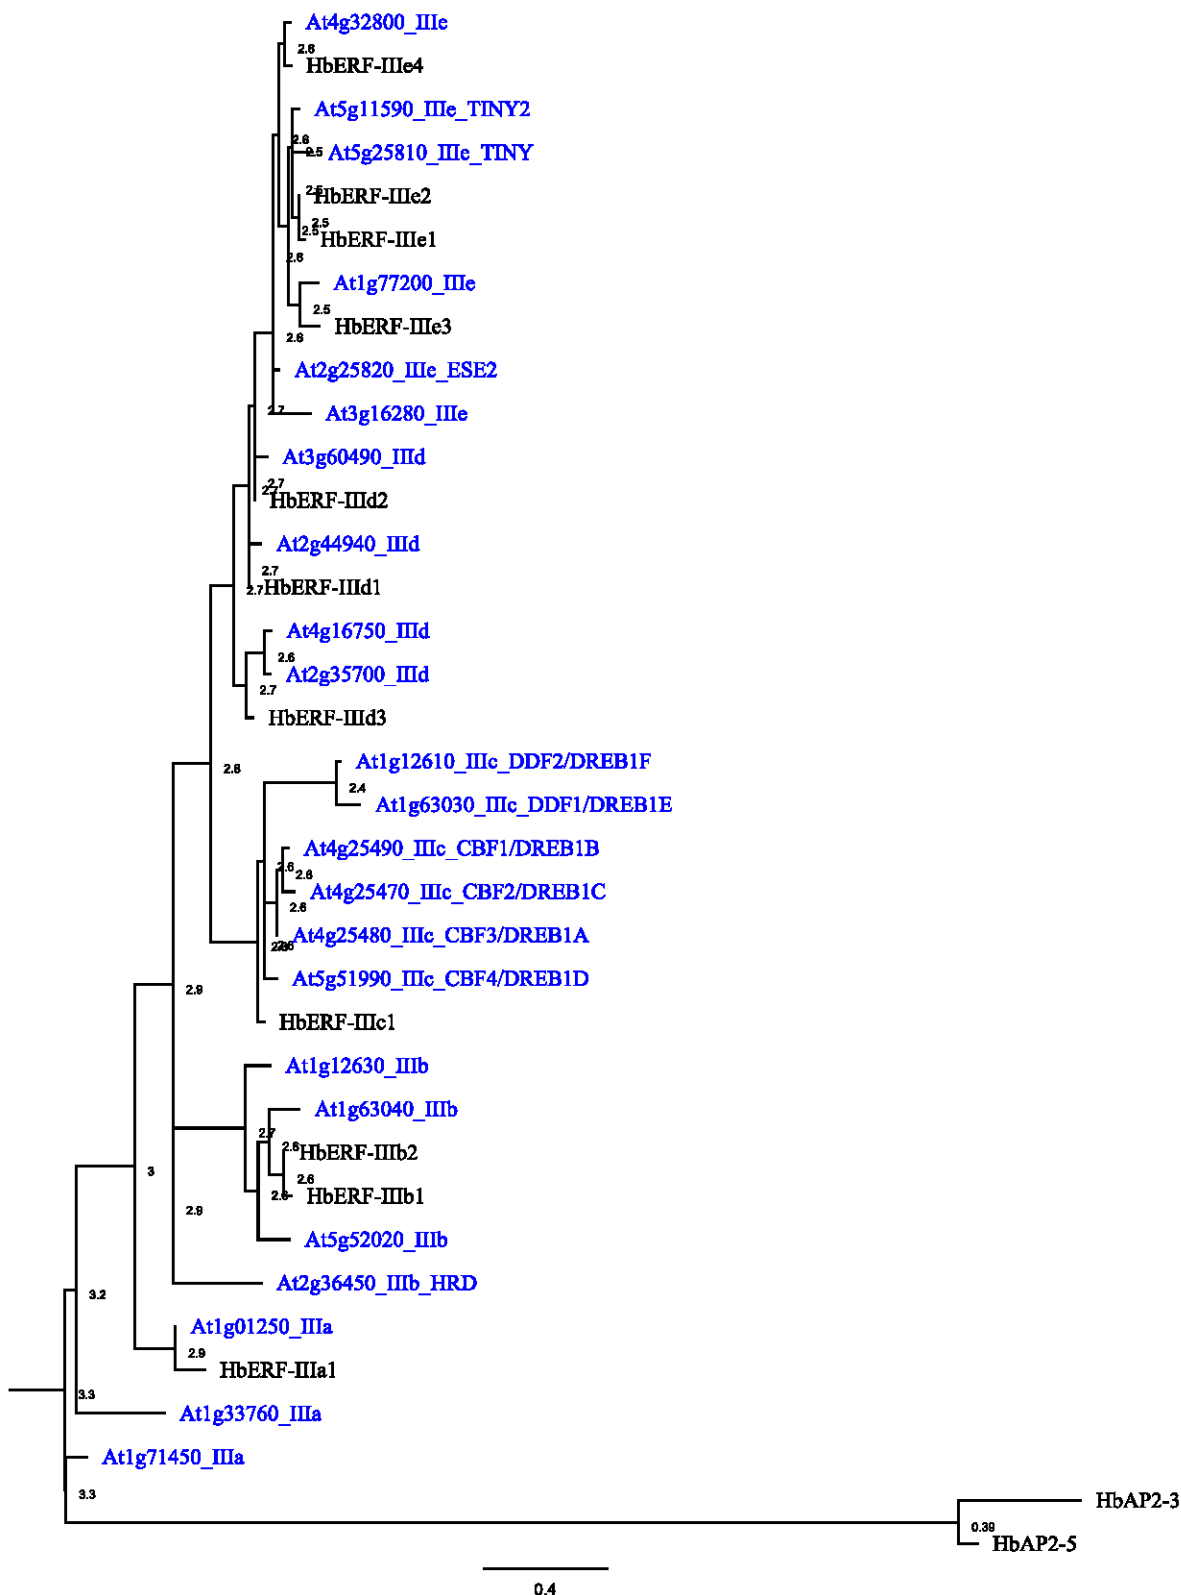

Figure 3

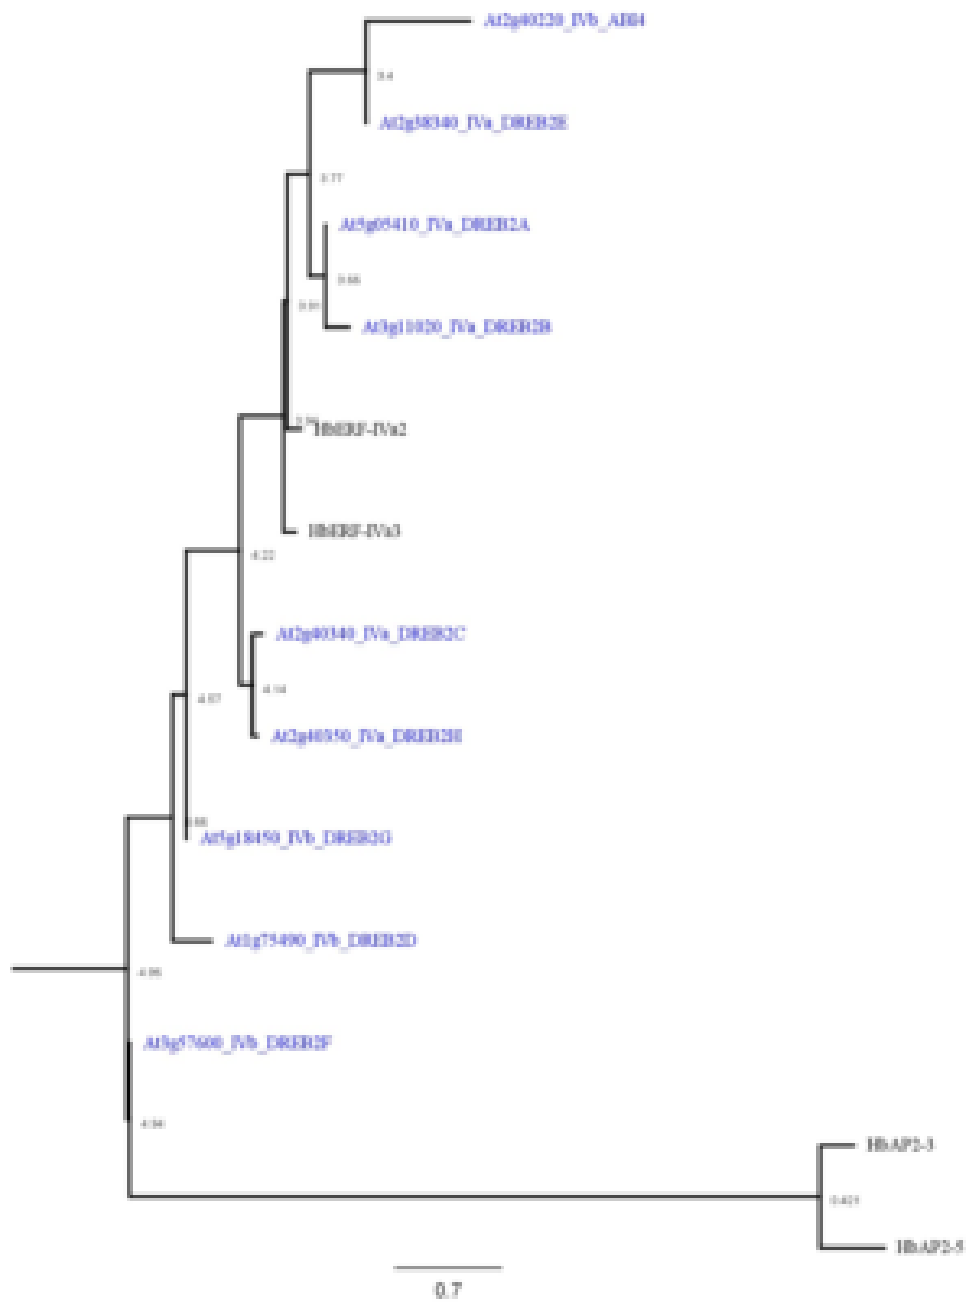

**Figure 4**

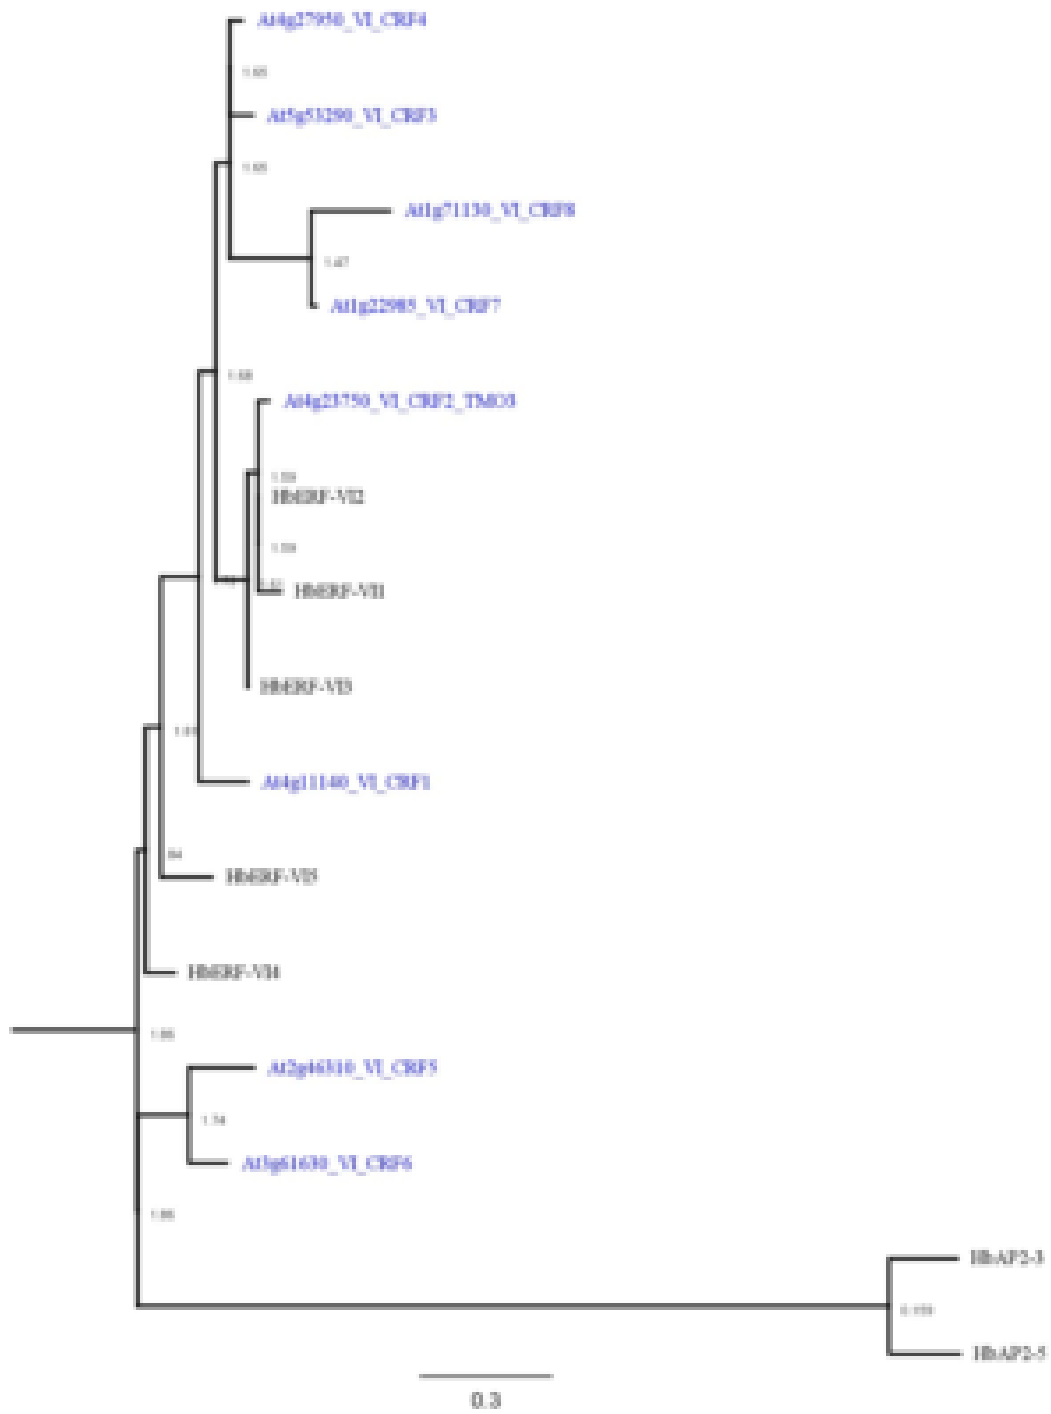

**Figure 5**

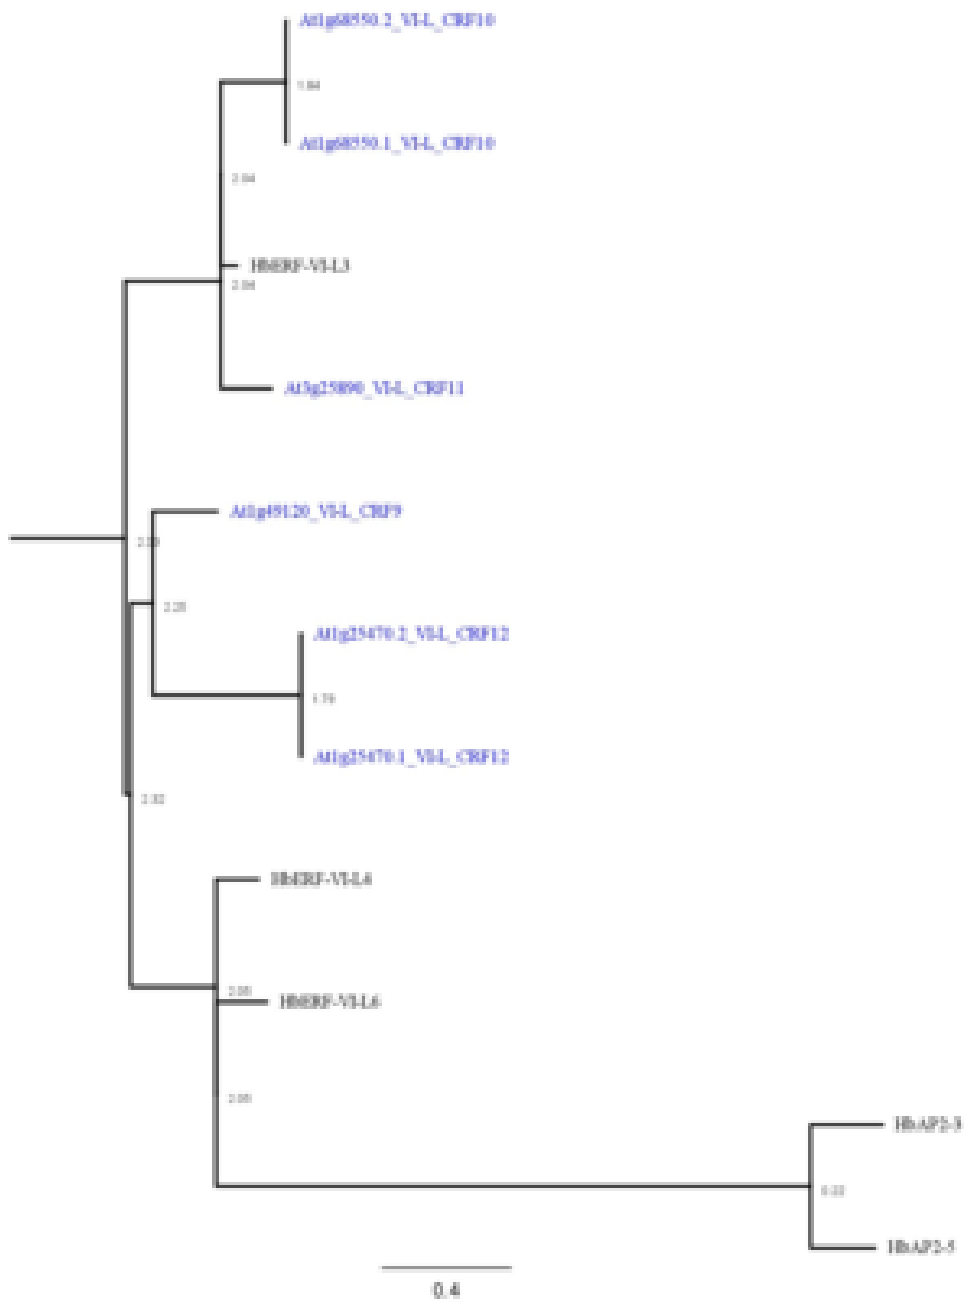

**Figure 6**

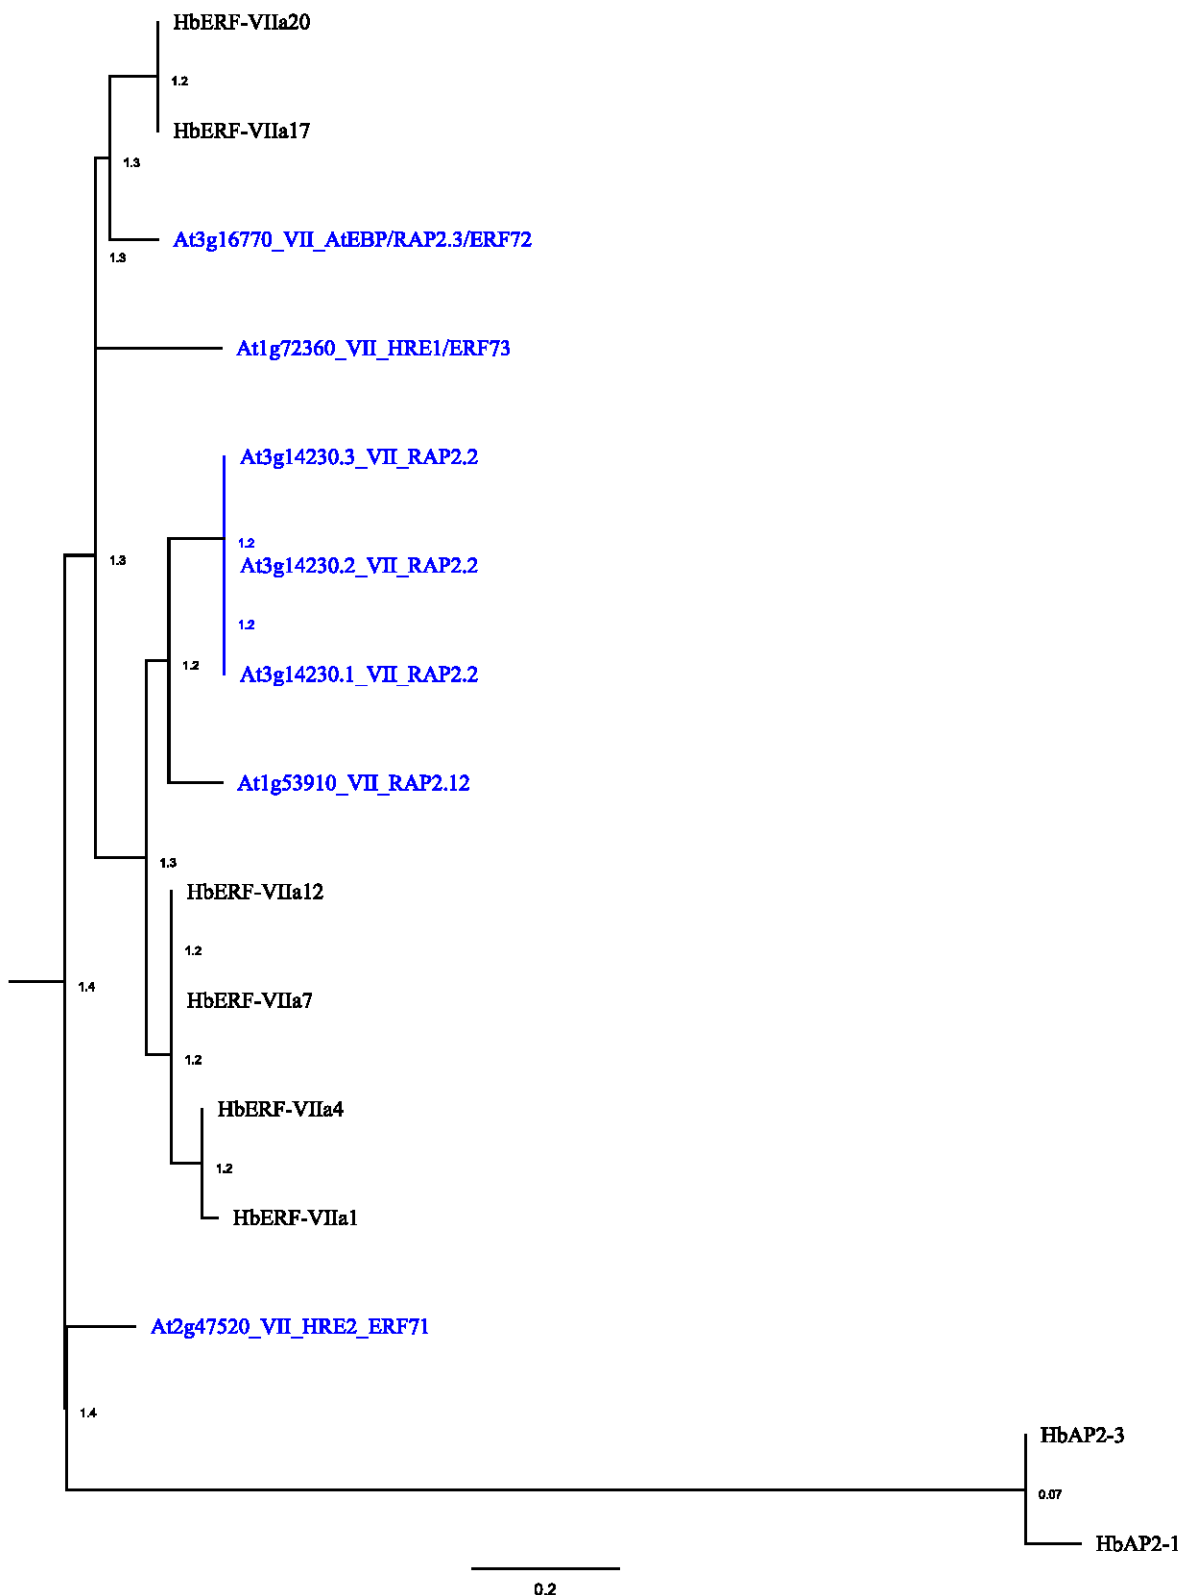

**Figure 7**

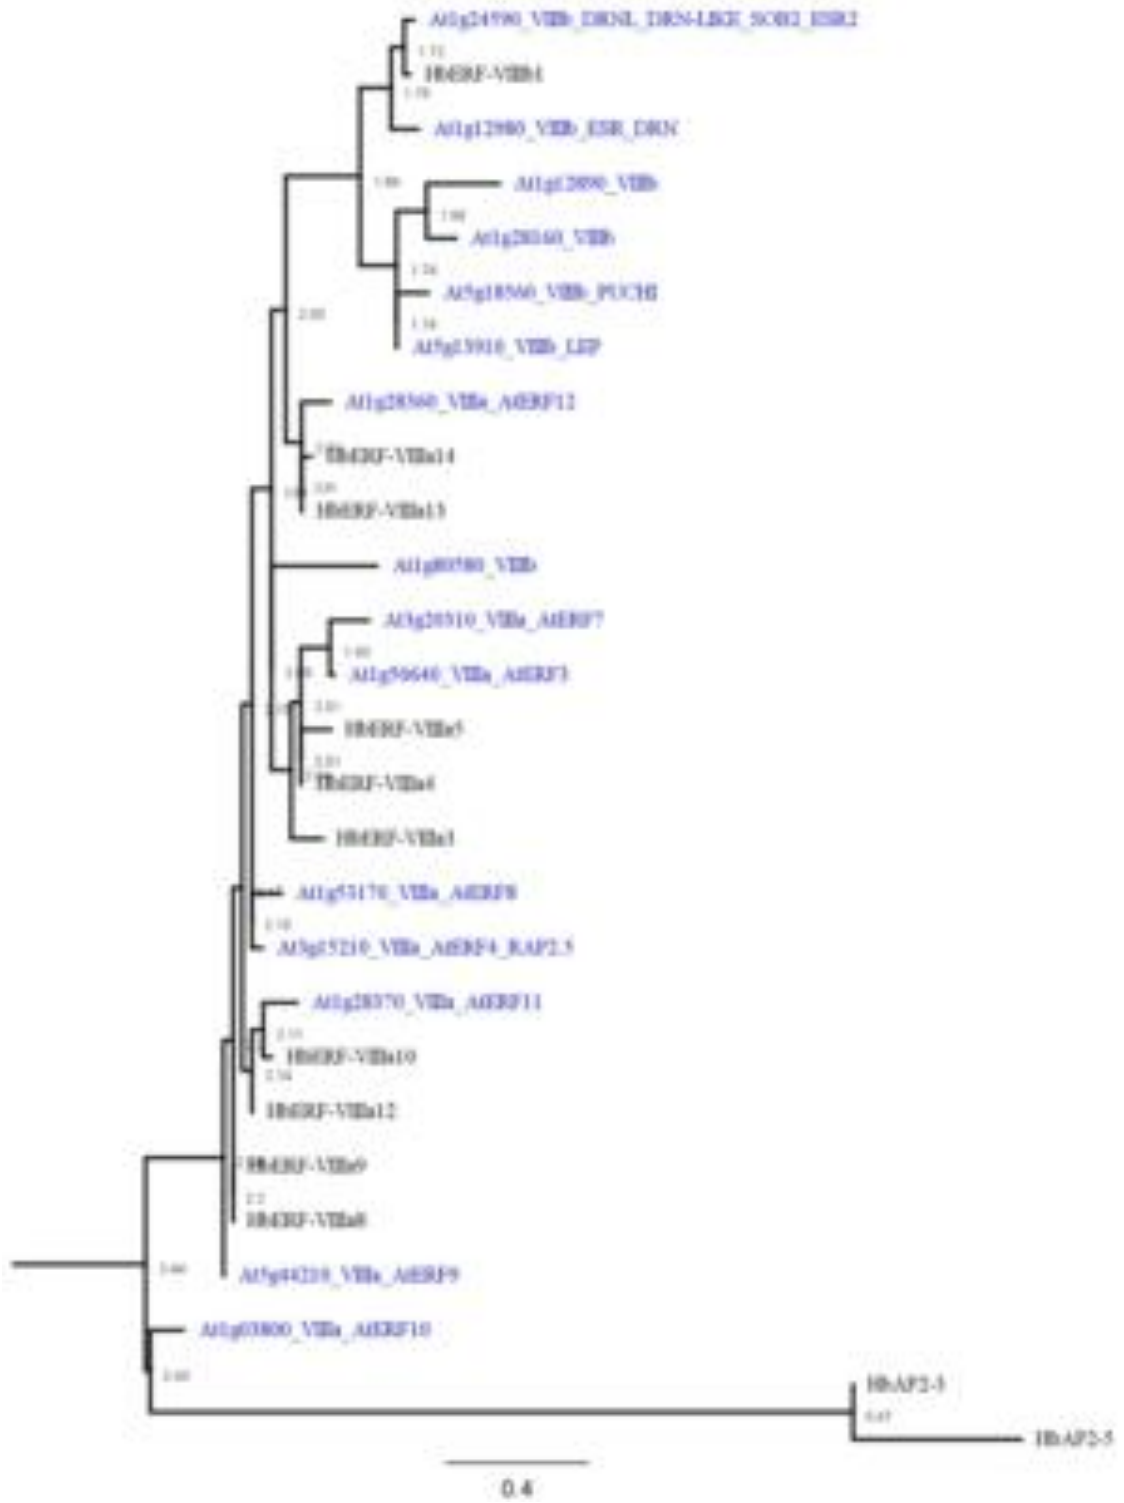

Figure 8



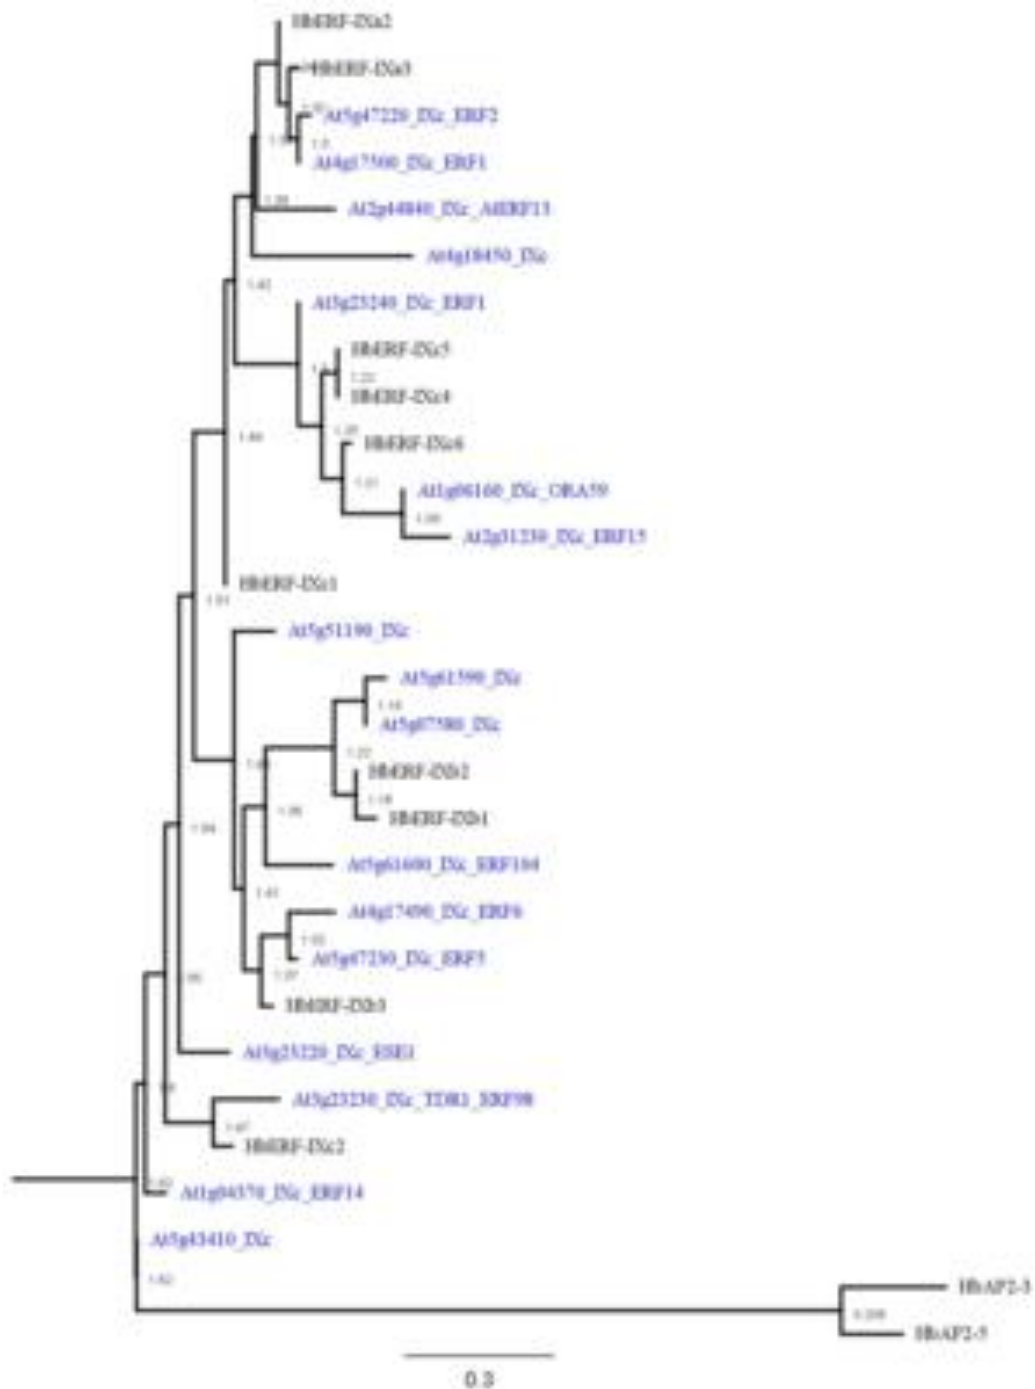

Figure 9

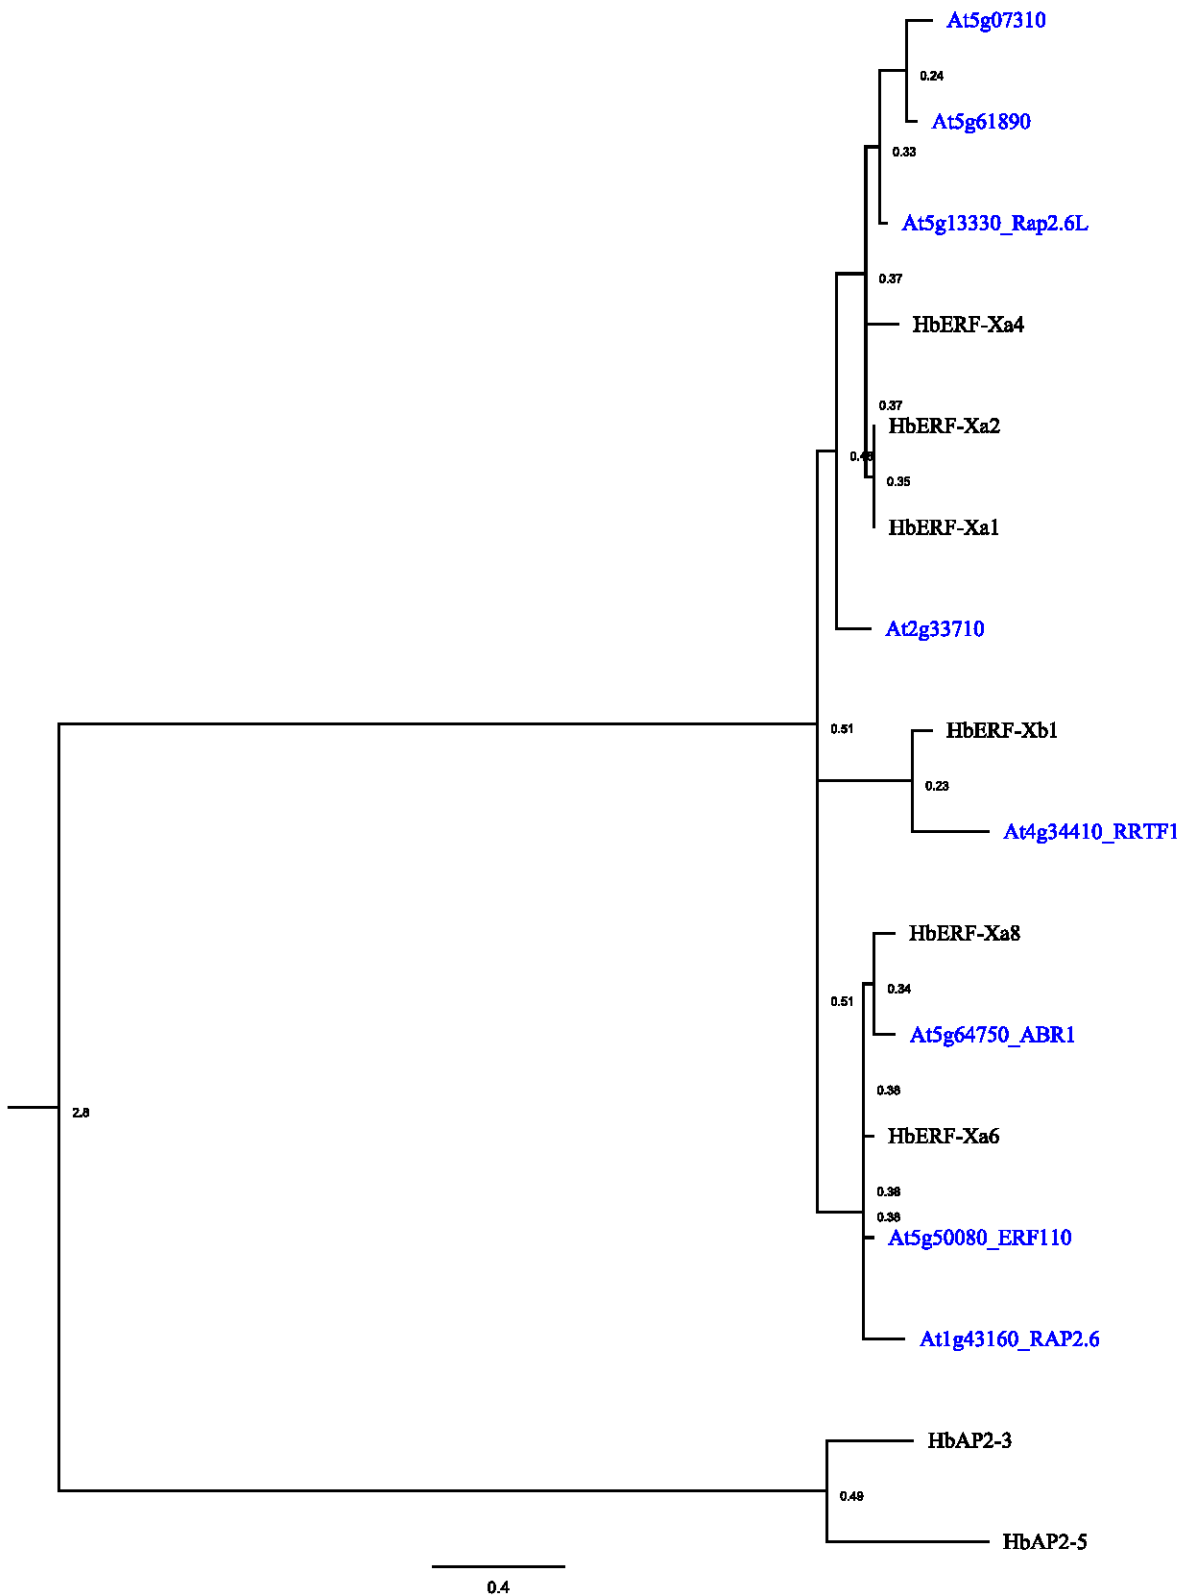

Figure 10

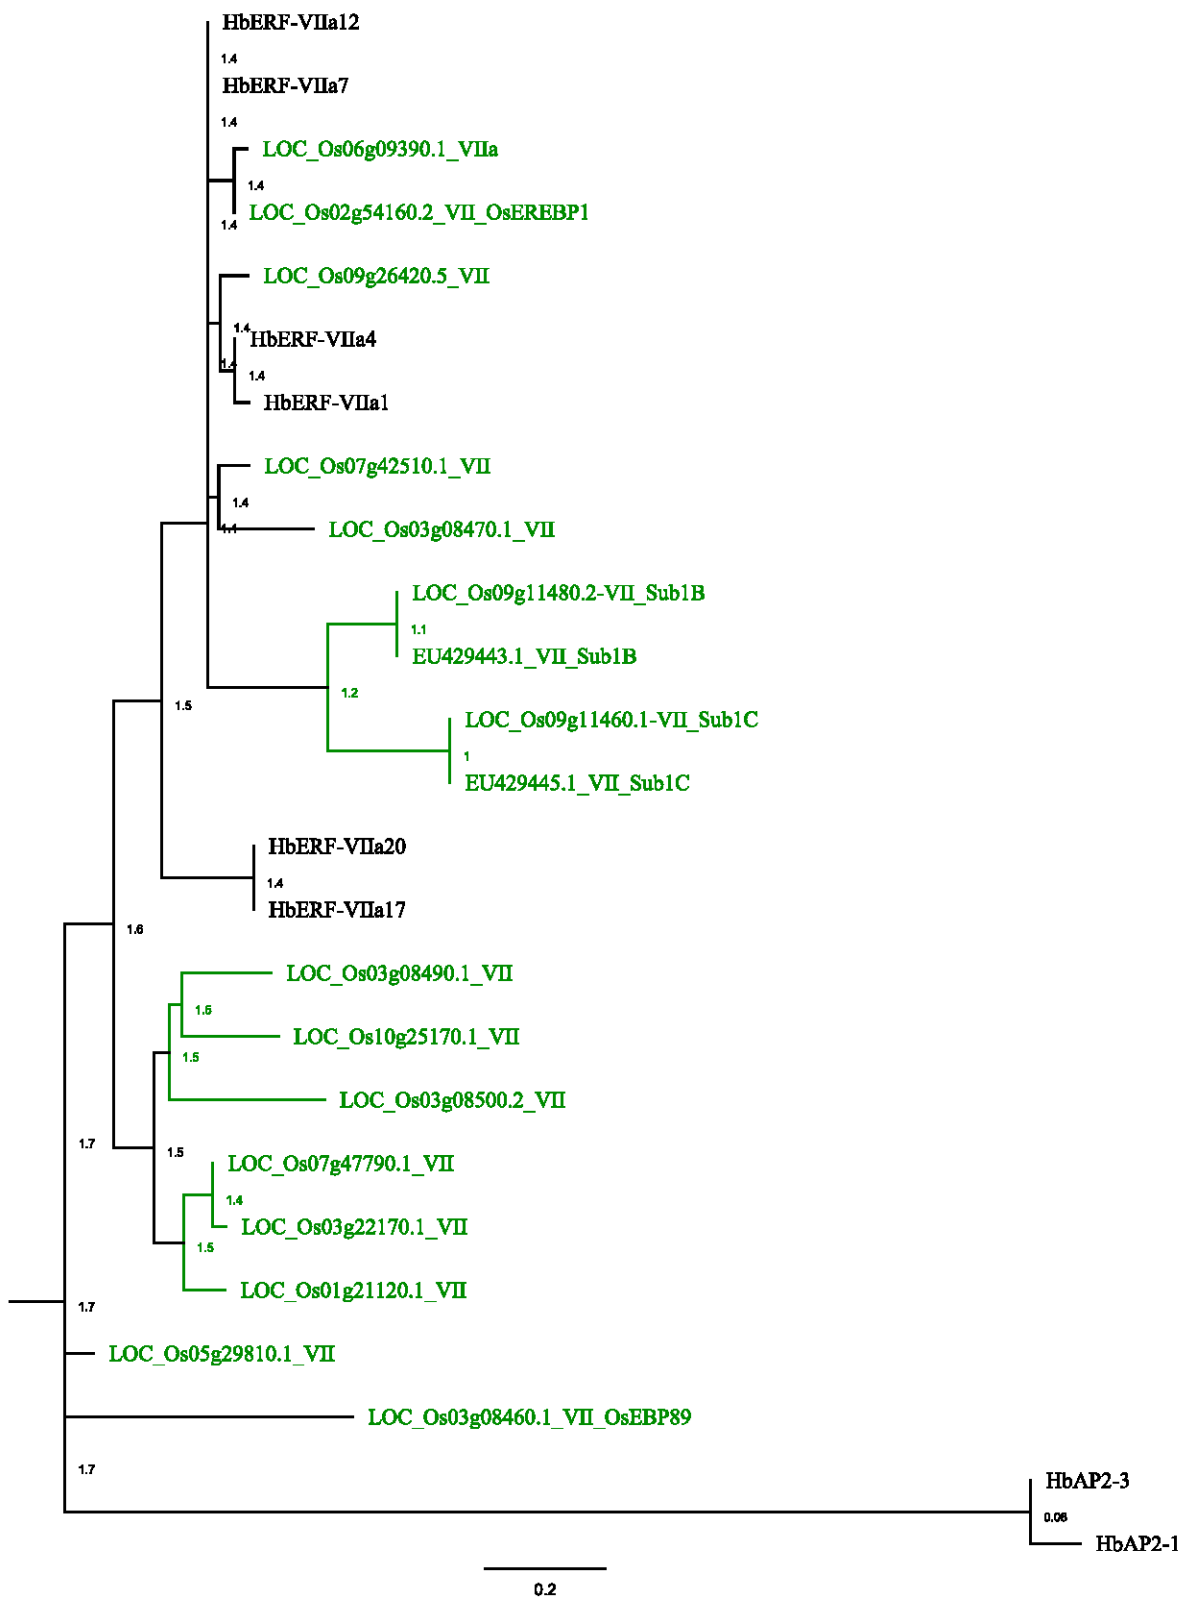

Figure 11
